# Supplementary material for: Attenuation of dopamine-modulated prefrontal value signals underlies probabilistic reward learning deficits in old age
Source: eLife journal article supplement (doi:10.7554/elife.26424), 2017-09-04
Supplement: supp [file elife_poa_e26424_Supplementary_file_4.xlsx]

## Sheet: Sheet1
	test	N	page	line
behaviour: wins	independent sample t-test (one-tailed)	30/27	6	100-109
behaviour: switches	Mann-Whitney (two-tailed)	30/27	6	100-109
behaviour: efficient choices	Mann-Whitney (one-tailed)	30/27	6	100-109
behaviour: correlation wins / switches	pearson's correlation	57	6	100-109
model parameter κ / wins	pearson's correlation	57	11	203
model parameters between group	Mann-Whitney(two-tailed)	30/27	11	214-215
multivariate analysis between groups	one-way manova	57	12	217
model fit between groups	Mann-Whitney (two-tailed)	30/27	12	218
behaviour: adaptive switches	independent sample t-test (two-tailed)	30/27	12	226-227
association adaptive switches / wins	pearson's correlation	57	12	228
value representation in vmPFC	independent sample t-test (two-tailed)	30/27	13	244
correlation age / vmPFC in half the sample	pearson's correlation	26	13	248
value representation in vmPFC	independent sample t-test (two-tailed)	13/15	13	249-250
association Q in vmPFC / performance	pearson's correlation	57	13	255-260
association age / performance	pearson's correlation	57	13	259-261
association Q in vmPFC / age	pearson's correlation	57	13	262
relationship Q in vmPFC and performance	linear regression	57	13	262-267
relationship Q in vmPFC and performance for RW model	linear regression	57	14	271-273
difference in mean activation for R and Q	two-sample t-test	27/30	17	315-316
difference in mean activation for RPE	two-sample t-test	27/30	17	316-318
difference in residuals between Bayesian and RW model for Nacc	paired t-test	57	17	329-330
difference in residuals between Bayesian and RW model for vmPFC	paired t-test	57	17	336
correlations among BPs in ROIs	pearson's correlation	56	19	360-361
correlations BPs and Q in vmPFC	pearson's correlation	56	19	368-369
relationship Q vmPFC and BPNAcc	pearson's correlation	56	19	370
mediation of Q vmPFC by BPNAcc	linear regression	56	19	371-374
interaction group and effect of BPNAcc on Q	ANOVA	30/27	20	377
relationship betweenQ in NAcc and D1 BP	pearson's correlation	56	20	379-391
