# Supplementary figures and images for: Attenuation of dopamine-modulated prefrontal value signals underlies probabilistic reward learning deficits in old age
Source: eLife journal article supplement (doi:10.7554/elife.26424), 2017-09-04

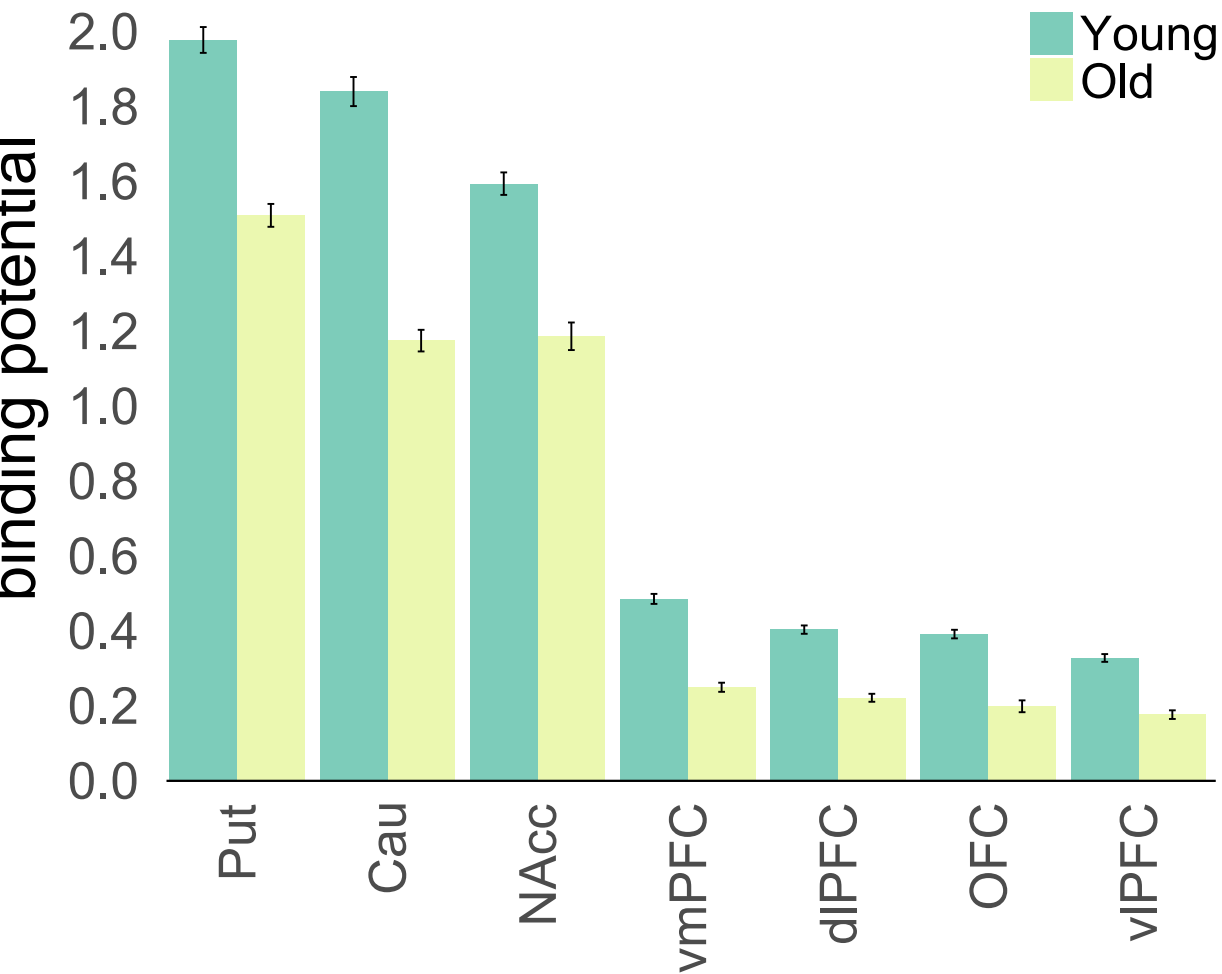

Supplement: supp [file elife_poa_e26424_Figure_1_figure_supplement_1.pdf › elife_poa_e26424_Figure_1_figure_supplement_1.pdf]

a

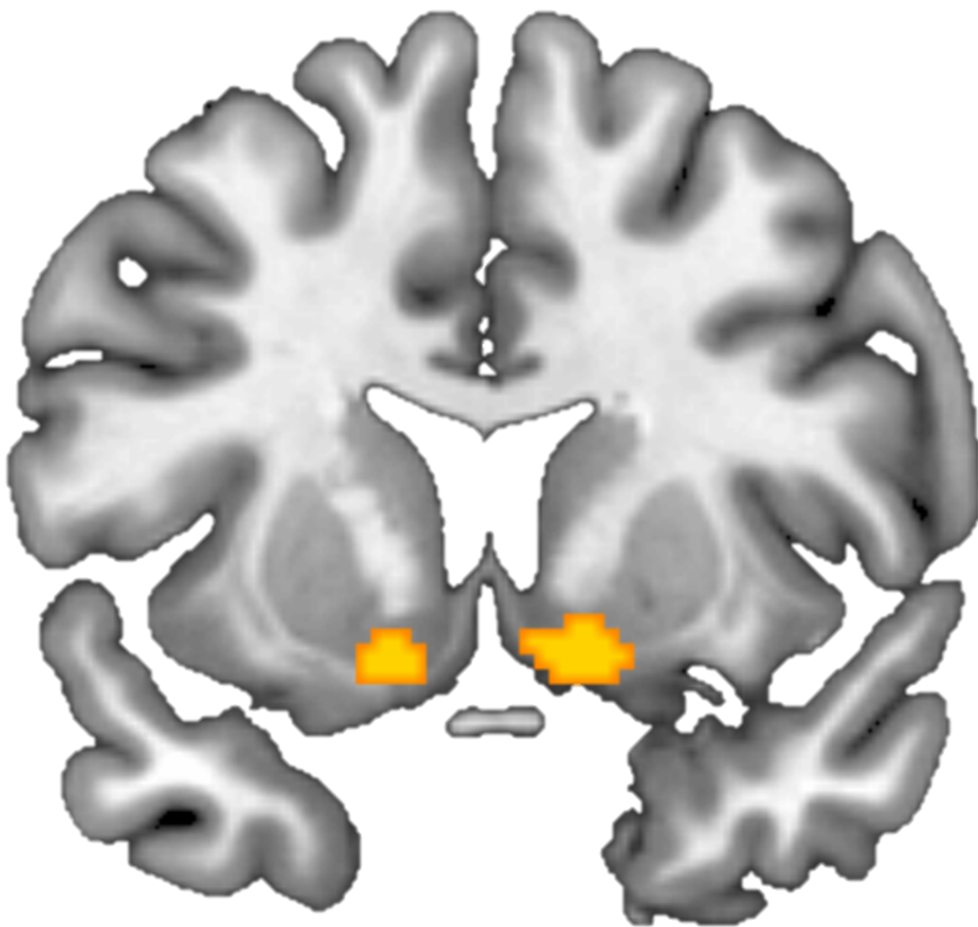

b

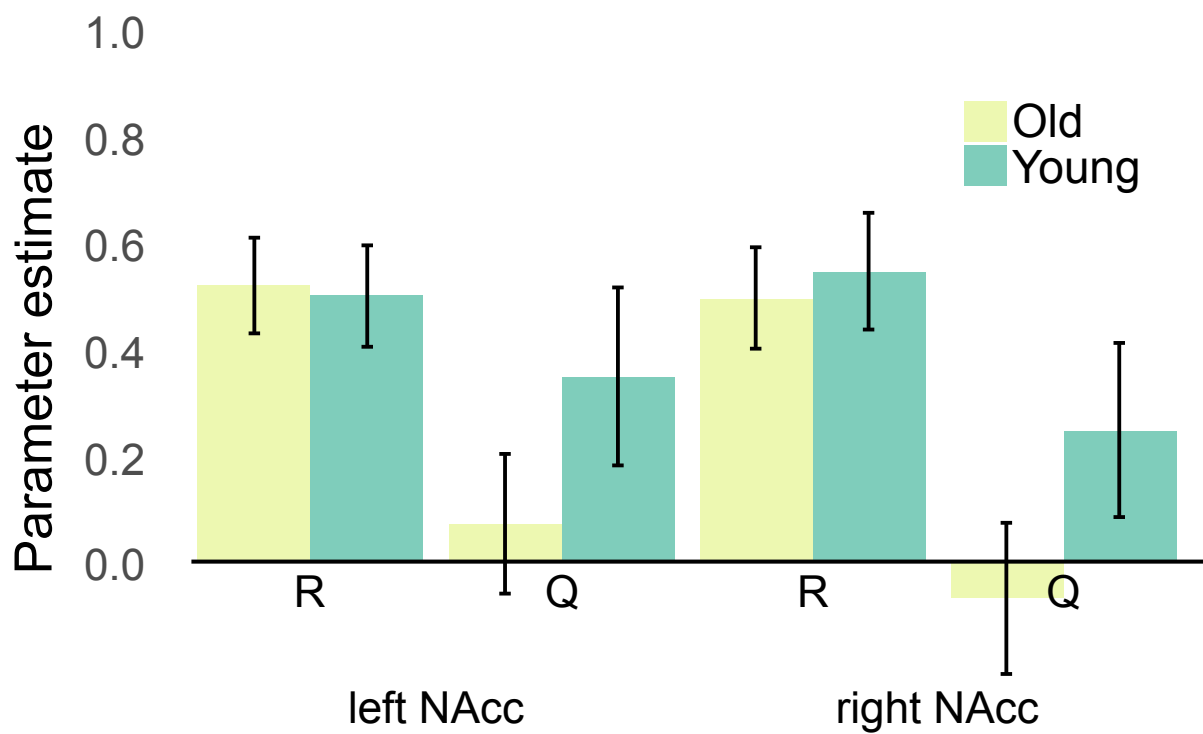

Supplement: supp [file elife_poa_e26424_Figure_4_figure_supplement_1.pdf › elife_poa_e26424_Figure_4_figure_supplement_1.pdf]
